## ELECTROLYTE AND GAS EXCHANGE DURING THE MOULTING CYCLE OF A FRESHWATER CRAYFISH

BY MICHELE G. WHEATLY

*Department of Zoology, University of Florida, Gainesville, FL 32611, USA*

AND LORI A. IGNASZEWSKI

*Department of Medical Sciences, College of Veterinary Medicine,  
University of Florida, Gainesville, FL 32611, USA*

*Accepted 29 March 1990*

### Summary

Whole-animal net electrolyte fluxes ( $\text{Ca}^{2+}$ , apparent  $\text{H}^+$ , titratable acidic equivalents, ammonia,  $\text{Na}^+$ ,  $\text{Cl}^-$ ,  $\text{K}^+$ ,  $\text{Mg}^{2+}$ , phosphate and sulphate) and respiratory gas exchange were monitored throughout the moulting cycle in juvenile freshwater crayfish *Procambarus clarkii* (Girard) at 21°C. Intermoult crayfish were essentially in ion balance. As crayfish approached ecdysis (–3 days, where  $t=0$  is the day when the cuticle is shed), there was a net efflux of  $\text{Ca}^{2+}$  ( $-1000 \mu\text{mol kg}^{-1} \text{h}^{-1}$ ) correlated with a corresponding uptake of acidic equivalents (or base output) of  $+2000 \mu\text{mol kg}^{-1} \text{h}^{-1}$ . Following ecdysis, both fluxes switched vector; uptake of  $\text{Ca}^{2+}$  ( $+2000 \mu\text{mol kg}^{-1} \text{h}^{-1}$ ) and basic equivalents ( $+4000 \mu\text{mol kg}^{-1} \text{h}^{-1}$ ) were completed within 6 days. The moulting cycle also affected fluxes of electrolytes other than those involved in  $\text{CaCO}_3$  resorption and deposition. Crayfish remained in  $\text{Na}^+$  and  $\text{Cl}^-$  balance from intermoult up to ecdysis. Following ecdysis, both were taken up actively at rates of around  $+500 \mu\text{mol kg}^{-1} \text{h}^{-1}$  for 3 days, presumably restoring the haemodilution that would have resulted from water loading. A premoult efflux of  $\text{K}^+$  was partially offset by postmoult uptake. Meanwhile, crayfish experienced increased efflux of phosphate following ecdysis, probably because of increased integumentary permeability. Rates of  $\text{O}_2$  uptake ( $\dot{M}_{\text{O}_2}$ ) and  $\text{CO}_2$  excretion ( $\dot{M}_{\text{CO}_2}$ ) increased to peak values (double intermoult rates) immediately prior to ecdysis. While  $\dot{M}_{\text{O}_2}$  recovered during postmoult,  $\dot{M}_{\text{CO}_2}$  dropped precipitously, significantly reducing the gas exchange ratio. Since the  $\dot{M}_{\text{CO}_2}$  deficit agreed well with the postmoult basic equivalent uptake, the latter is probably attributable to  $\text{HCO}_3^-$  uptake for calcification.

### Introduction

The predominant cuticular mineral in crustaceans is  $\text{CaCO}_3$ . Studies of ionoregulation during the crustacean moulting cycle have focused on calcium

Key words: crayfish, moulting, calcium, acid–base balance.

(reviewed by Greenaway, 1985) and only recently on the dynamics of carbonate (Roer and Dillaman, 1984). Intermoult crustaceans are generally in  $\text{Ca}^{2+}$  balance. During the premoult period, exoskeletal  $\text{Ca}^{2+}$  is reabsorbed from the old cuticle and either lost to the environment or partially conserved, which happens in species that live in  $\text{Ca}^{2+}$ -limited environments such as fresh water or on land. At ecdysis the old exoskeleton is shed and  $\text{Ca}^{2+}$  remaining in it lost. Calcification of the new exoskeleton begins shortly after ecdysis using external and/or stored sources of  $\text{Ca}^{2+}$ . The mechanism of  $\text{Ca}^{2+}$  uptake is located in the gills and is probably analogous to that of fish, where a  $\text{Ca}^{2+}$ -ATPase has been implicated (see model of Flik *et al.* 1985). Studies have suggested that both metabolic and environmental  $\text{CO}_2$  (probably in the form of bicarbonate) are the source of carbonate required for  $\text{CaCO}_3$  formation (Roer and Dillaman, 1984; Cameron and Wood, 1985). In the process, protons are produced *via* the reaction:

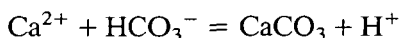

and these protons require a mechanism for outward transport (Cameron, 1985).

While  $\text{Ca}^{2+}$ ,  $\text{HCO}_3^-$  and  $\text{H}^+$  fluxes are important in mineral reabsorption/deposition, moulting will also indirectly affect the regulation of other ions, more so in freshwater than in marine species. The increase in size during ecdysis is accomplished by uptake of external water. For freshwater species such as the crayfish, which normally hyperregulate extracellular osmolality and ion concentrations, this will cause haemolymph dilution. Thus during postmoult, in addition to accumulating  $\text{CaCO}_3$ , circulating levels of major electrolytes such as  $\text{Na}^+$  and  $\text{Cl}^-$  must be restored. In fact, there is preliminary evidence of coupled  $\text{Na}^+/\text{Ca}^{2+}$  exchange across mammalian basolateral membranes (Taylor and Windhager, 1979) and in an isolated cuticular crab hypodermis (Roer, 1980); however, it has not yet been demonstrated in branchial  $\text{Ca}^{2+}$  transport in fish (Flik *et al.* 1985). Another feature of moulting that could potentially affect ion balance is the increase in cuticular permeability around the time of ecdysis, which has been demonstrated for respiratory gases (Mangum *et al.* 1985) and would be expected to increase diffusional ion efflux.

Calcium balance at various stages in the moulting cycle has been documented in the freshwater crayfish by McWhinnie (1962) and Greenaway (1974a,b,c). Greenaway (1974c) alluded to the necessity for  $\text{Na}^+$  and  $\text{Cl}^-$  uptake during postmoult. He also hypothesized that the  $\text{HCO}_3^-$  for calcification originated both externally and from metabolic  $\text{CO}_2$ , since removal of external  $\text{HCO}_3^-$  reduced but did not eliminate  $\text{Ca}^{2+}$  uptake. This was confirmed by Cameron and Wood (1985), who demonstrated apparent  $\text{H}^+$  excretion in postmoult blue crabs which matched a net  $\text{CO}_2$  deficit (negative  $\text{CO}_2$  excretion).  $\text{CO}_2$  excretion has not been measured during the moulting cycle in the freshwater crayfish, although Scudamore (1947) measured variations in the rate of  $\text{O}_2$  uptake.

The purpose of the present study was to correlate net  $\text{Ca}^{2+}$  fluxes throughout the moulting cycle of the freshwater crayfish with fluxes of acidic/basic equivalents, major haemolymph electrolytes and respiratory gases.

### Materials and methods

#### *Animals and protocols*

Measurements were made on 32 juvenile crayfish (mean mass  $\pm$  S.E.M.,  $1.58 \pm 0.18$  g) *Procambarus clarkii*, which were obtained from Louisiana State University Agricultural Centre, Baton Rouge. In Gainesville they were kept 10 to a 30-l aquarium under a 12 h light: 12 h dark cycle at 21°C. The water was recycled through a bottom filter and was replaced every 3 days with dechlorinated thermoequilibrated tapwater. Local tapwater had the following ionic composition (in  $\text{mmol l}^{-1}$ ):  $\text{Na}^+$ , 0.55;  $\text{K}^+$ , 0.04;  $\text{Ca}^{2+}$ , 0.58;  $\text{Mg}^{2+}$ , 0.43;  $\text{Cl}^-$ , 0.73; phosphate, 0.003; titration alkalinity 1.80; pH 7.8.

Under these laboratory conditions, this size class moulted naturally approximately every 21 days. Whole-body net electrolyte fluxes and gas exchange rates were measured as a function of time before ( $t = -7, -3$  or  $-1$  days; premoult) or after ( $t = 1-6$  days; postmoult) ecdysis ( $t = 0$  days) and compared with intermoult values (more than 10 days prior to ecdysis). Premoult was determined by viewing the degree of development of new setae on the uropods and telson (Stevenson, 1985). [For comparison with Drach's (1939) moulting stages,  $t = -3$  and  $-1$  days in this study correspond to stage D1-3,  $t = +1$  day to stage A,  $t = +2$  to  $+4$  days to stage B and  $t = +6$  days to stage C; however, these stages tend to be somewhat arbitrary.]

To determine net whole-body electrolyte fluxes, appropriately staged crayfish were placed individually in experimental chambers containing a fixed volume of tapwater. Chambers were individually aerated and visually shielded. Crayfish remained in the flux water for a total of 24 h and electrolyte concentrations were determined in water samples removed at the start and end of this period. Fluxes were initially determined on 12 crayfish whose mean mass was  $1.66 \pm 0.18$  g. (Mass increased by  $7.2 \pm 2.1$  % after ecdysis in this size class.)

Intermoult flux rates of all ions dictated a flux volume of 50 ml. However, it became apparent after these initial experiments that postmoult  $\text{Ca}^{2+}$  uptake was potentially limited in such a small volume, since ambient concentration fell below the saturation level for the uptake mechanism (Greenaway, 1974c). Rather than reduce the length of the flux period, thereby increasing handling stress, we increased flux volume to 500 ml in a second group of postmoult crayfish (mean mass  $1.74 \pm 0.20$  g,  $N=8$ ) and remeasured  $\text{Ca}^{2+}$  and acidic equivalent fluxes. In a third series we remeasured postmoult fluxes of other ions ( $\text{Na}^+$ ,  $\text{Cl}^-$ , etc.) in a volume of 150 ml to determine whether these were affected by external  $\text{Ca}^{2+}$  or flux volume. Since no effect could be demonstrated we have reported the original postmoult data for these ions.

Whole-animal rates of  $\text{O}_2$  uptake ( $\dot{M}_{\text{O}_2}$ ) and  $\text{CO}_2$  excretion ( $\dot{M}_{\text{CO}_2}$ ) were determined by continuous-flow respirometry as outlined in Wheatly (1989a) on 12 crayfish of mean mass  $1.71 \pm 0.14$  g. (In this group mass increased by  $9.5 \pm 1.4$  % after ecdysis.) Respirometers (volume 10 ml) were manufactured from 20 ml disposable syringes. These were fed with air-equilibrated water from a Gilson

minipulse2 pump at a constant flow rate of  $1 \text{ ml min}^{-1}$ . Incurrent (inc) and excurrent (exc) flows were sampled for  $\text{O}_2$  tension ( $P_{\text{O}_2}$ ) and total  $\text{CO}_2$  content ( $C_{\text{CO}_2}$ ). Crayfish were placed in the experimental apparatus at least 6 h before sampling to allow the animal to settle and the respirometer to equilibrate. Five successive pairs of incurrent and excurrent samples were then removed over a period of 3 h to compute a mean value. All respirometers were tested for diffusive gas entry and adequate mixing.

### *Analytical techniques*

Water total ion concentrations of  $\text{Na}^+$ ,  $\text{K}^+$ ,  $\text{Ca}^{2+}$  and  $\text{Mg}^{2+}$  were measured using an atomic absorption spectrophotometer (Perkin Elmer model 5000) and chloride ion concentration by coulometric titration (Radiometer CMT 10). Sulphate concentration was determined by the turbidometric method of Jackson and McCandless (1978) and phosphate concentration by the phosphomolybdate method of Atkinson *et al.* (1973). Titration alkalinity was determined by titrating an air-equilibrated 10 ml sample to pH 4 with  $0.02 \text{ mol l}^{-1}$  HCl (McDonald and Wood, 1981) and ammonia ( $\text{NH}_3 + \text{NH}_4^+$ ) using the phenolphthorite method (Solorzáno, 1969).

Water  $P_{\text{O}_2}$  was measured using a thermoequilibrated  $\text{O}_2$  electrode (IL 20984) connected to an IL 213 blood gas analyser. Flow rate through the respirometer was adjusted so that the drop in  $P_{\text{O}_2}$  never exceeded 4 kPa.  $C_{\text{CO}_2}$  was measured using the Capni-Con (Cameron Instruments Co.) adapted for use with water samples, as outlined by the manufacturer and Cameron and Wood (1985).

### *Calculations*

Net flux rate of electrolyte  $X$  was calculated in  $\mu\text{mol kg}^{-1} \text{ h}^{-1}$  as:

$$J_{\text{net}}^X = \frac{([X]_i - [X]_f)V}{tW}, \quad (1)$$

where  $i$  and  $f$  refer to initial and final water concentrations ( $\mu\text{mol ml}^{-1}$ ),  $V$  is flux volume (ml),  $t$  is elapsed time (h) and  $W$  is mass (kg). A negative value indicates net loss and *vice versa*. By reversing the  $i$  and  $f$  terms, the net titratable acidity (TA) flux could be calculated from the titratable alkalinities. The net flux of acidic equivalents ( $J_{\text{net}}^{\text{H}^+}$ , also termed 'apparent  $\text{H}^+$  flux') was calculated as the sum of the titratable acidity and ammonia components (McDonald and Wood, 1981). This method does not distinguish between excretion of acidic equivalents and uptake of basic equivalents or *vice versa*.

$\dot{M}_{\text{O}_2}$  was calculated in  $\mu\text{mol kg}^{-1} \text{ min}^{-1}$  as:

$$\dot{M}_{\text{O}_2} = \frac{(P_{\text{O}_2, \text{inc}} - P_{\text{O}_2, \text{exc}})\beta_{\text{O}_2}F}{W}, \quad (2)$$

where  $\beta_{O_2}$  is the  $O_2$  capacitance in fresh water at 21°C (in  $\mu\text{mol l}^{-1} \text{ kPa}^{-1}$ , taken from Dejours, 1981) and  $F$  is flow rate in  $\text{l min}^{-1}$ .

Similarly  $\dot{M}_{CO_2}$  was calculated in  $\mu\text{mol kg}^{-1} \text{ min}^{-1}$  as:

$$\dot{M}_{CO_2} = \frac{(C_{CO_2,exc} - C_{CO_2,inc})F}{W}, \quad (3)$$

where  $C_{CO_2}$  is measured in  $\mu\text{mol l}^{-1}$ .

Finally the respiratory exchange ratio,  $R$ , was calculated as:

$$R = \dot{M}_{CO_2} / \dot{M}_{O_2}. \quad (4)$$

### Statistical treatment

Data are expressed throughout as mean  $\pm$  S.E.M. (number of observations). Flux measurements were compared with zero by means of a modified  $t$ -test enabling a data set to be compared with a single point (Bailey, 1981). Statistical differences among treatment means were determined by one-way analysis of variance (dependent variable  $\times$  time). When a significant  $F$  ratio was obtained, multiple comparisons were performed using Fisher's least significant difference (Ott, 1988). Statistical significance was accepted at  $P < 0.05$ .

## Results

Electrolyte fluxes and gas exchange rates are both typically expressed per unit wet mass. Comparing values during the moulting cycle presents a unique problem since mass does not remain constant in individuals. Water loading at ecdysis results in increased mass which does not necessarily reflect an increase in metabolizing tissue. To give some idea of the potential magnitude of this problem, female blue crabs (*Callinectes sapidus*) undergo a 47% mass increase as they enter their terminal moult (Lewis and Haefner, 1976). Solutions commonly employed to circumvent this problem are to report individual whole-animal rates (Scudamore, 1947) or to correct for dry mass (Lewis and Haefner, 1976; Mangum *et al.* 1985). Whole-animal dry mass is not a good index to use since premoult will have a greater amount of inert material, some of which is shed at the moult. For the size of crayfish used in the present study, the mean increase in mass after ecdysis was only 8.4%, which is within the S.E.M. for the range of mass for which data are reported. Therefore, we feel justified in expressing mass-specific data using the mass at the time measurements were obtained.

### Electrolyte fluxes during the moulting cycle

The small net efflux of  $Ca^{2+}$  in intermoult crayfish (Fig. 1) was insignificantly different from zero ( $P > 0.05$ ), suggesting that they were in  $Ca^{2+}$  balance. This continued up until around 4 days premoult when a significant ( $P = 0.003$ ) net  $Ca^{2+}$  efflux of around  $-800 \mu\text{mol kg}^{-1} \text{ h}^{-1}$  was measured. Following ecdysis, this changed vector to a substantial ( $P < 0.001$ ) net influx initially approaching

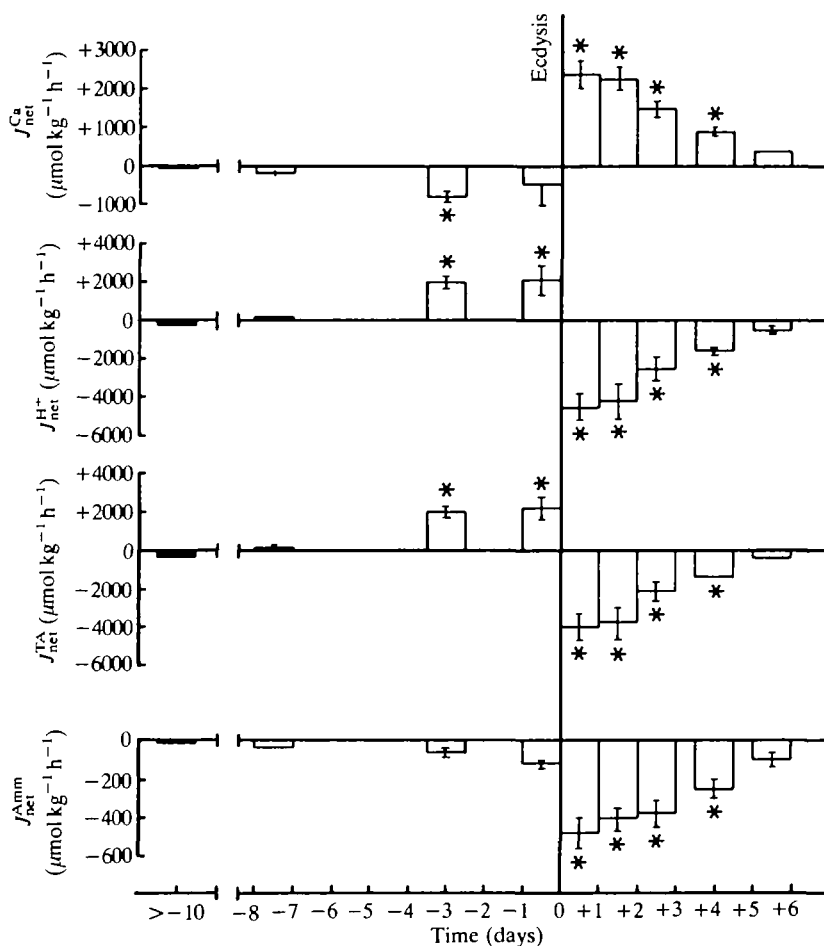

Fig. 1. Whole-animal net fluxes of  $\text{Ca}^{2+}$ , apparent  $\text{H}^+$ , titratable acidity (TA) and ammonia (Amm) with time throughout the moulting cycle in *Procambarus clarkii* (intermoult and premoult mean mass  $1.66 \pm 0.18$  g; postmoult mean mass  $1.74 \pm 0.20$  g) at  $21^\circ\text{C}$ . Ecdysis is indicated by the vertical line ( $t=0$  day). Values are expressed as mean  $\pm$  s.e.m. ( $N=12$  in premoult and 8 in postmoult). Wherever s.e.m. is not visible, it falls within the thickness of the line. By convention, positive fluxes indicate uptake by the crayfish and *vice versa*. Asterisks denote significance ( $P < 0.05$ ) compared with previous intermoult (more than 10 days prior to ecdysis, filled bars, extreme left).

$+2500 \mu\text{mol kg}^{-1} \text{h}^{-1}$ . In most crayfish, uptake commenced after ecdysis; however, in some it was measured *prior* to shedding, explaining the large error bar on day  $t=-1$ . As postmoult progressed, the influx rate decreased. From day 3 onwards, influx rates had dropped significantly ( $P < 0.001$ ) below day 1 postmoult rates; however, they remained significantly ( $P < 0.001$ ) above intermoult rates for a further 2–3 days.

Intermoult crayfish exhibited a significant ( $P < 0.001$ ) net apparent  $\text{H}^+$  output (or base uptake) of around  $-300 \mu\text{mol kg}^{-1} \text{h}^{-1}$  (Fig. 1), consisting primarily of

titratable acidic equivalents with only 3 % attributable to ammonia efflux. Around 3–4 days before ecdysis there was a significant ( $P<0.001$ ) net  $H^+$  influx (or base efflux) approaching  $+2000 \mu\text{mol kg}^{-1} \text{h}^{-1}$ , which persisted in all crayfish until shedding occurred. The flux then promptly changed vector to a significant ( $P<0.001$ )  $H^+$  efflux at initial rates exceeding  $-4000 \mu\text{mol kg}^{-1} \text{h}^{-1}$ . These rates were significantly reduced by day 3 ( $P<0.003$ ) although they continued to remain above intermolt levels for a further 2 days ( $P<0.044$ ). By the end of day 6, intermolt fluxes had been re-established. Identical trends were observed for titratable acidity fluxes. Ammonia excretion was significant ( $P<0.05$ ) in intermolt crayfish (Fig. 1) and did not change significantly during the premolt stages ( $P>0.05$ ). However, during immediate postmolt there was a significant increase from around  $-120$  to  $-500 \mu\text{mol kg}^{-1} \text{h}^{-1}$ . After 2 days postmolt, the rates had fallen significantly ( $P<0.02$ ) but remained above intermolt values for an additional 2 days ( $P<0.001$ ). Six days after the moult, control (intermolt) levels of ammonia excretion had been restored ( $P=0.189$ ).

The small net influxes of  $Na^+$  and  $Cl^-$  in intermolt crayfish (Fig. 2) were both insignificantly different from zero ( $P>0.05$ ), again suggesting ion balance. This persisted throughout the premolt phase, although there was less uniformity in the flux rates, especially in the day immediately preceding ecdysis. Individuals that had begun  $Ca^{2+}$  uptake prior to ecdysis also displayed net influx of both  $Na^+$  and  $Cl^-$  (around  $+500 \mu\text{mol kg}^{-1} \text{h}^{-1}$ ), whereas those crayfish that continued to excrete  $Ca^{2+}$  immediately prior to shedding also exhibited net efflux of  $Na^+$  and  $Cl^-$ . Immediately following ecdysis there was a significant net influx of both ions ( $P<0.001$ ), and the influx remained elevated above control for an additional 2 days. While  $Na^+$  influx remained at uniformly high levels ( $P>0.21$ ),  $Cl^-$  influx decreased significantly on the second day ( $P<0.01$ ), remaining at that level for the third day ( $P=0.46$ ). In absolute terms, postmolt  $Cl^-$  influx rates were virtually double those of  $Na^+$  ( $+833$  and  $+434 \mu\text{mol kg}^{-1} \text{h}^{-1}$ , respectively). After 3 days postmolt,  $Na^+$  and  $Cl^-$  balance was re-established.

Intermolt crayfish were similarly in  $K^+$  balance (Fig. 2) until 3–4 days preceding ecdysis, when a significant ( $P<0.001$ ) efflux at rates of around  $-70 \mu\text{mol kg}^{-1} \text{h}^{-1}$  was measured until ecdysis. Immediately after ecdysis, there was a significant net uptake ( $+14 \mu\text{mol kg}^{-1} \text{h}^{-1}$ ) for 1 day ( $P<0.04$ ). Thereafter,  $K^+$  balance was restored.

Intermolt crayfish excreted significant ( $P<0.01$ ) amounts of  $Mg^{2+}$  ( $-21.4 \pm 5.9 \mu\text{mol kg}^{-1} \text{h}^{-1}$ ) and sulphate ( $-75.4 \pm 15.6 \mu\text{mol kg}^{-1} \text{h}^{-1}$ ). Multiple comparisons failed to reveal any significant changes in either throughout the moulting cycle. Phosphate excretion (Fig. 3) was negligible ( $P>0.10$ ) in inter- and premolt crayfish. During postmolt, there was a significant ( $P<0.005$ ) phosphate excretion for the first two days.

#### *Respiratory gas exchange during the moulting cycle*

Intermolt crayfish had a mean  $\dot{M}_{O_2}$  of  $46 \mu\text{mol kg}^{-1} \text{min}^{-1}$  and a corresponding  $\dot{M}_{CO_2}$  of  $57 \mu\text{mol kg}^{-1} \text{min}^{-1}$ , producing an R of 1.27 (Fig. 4). Analysis of variance

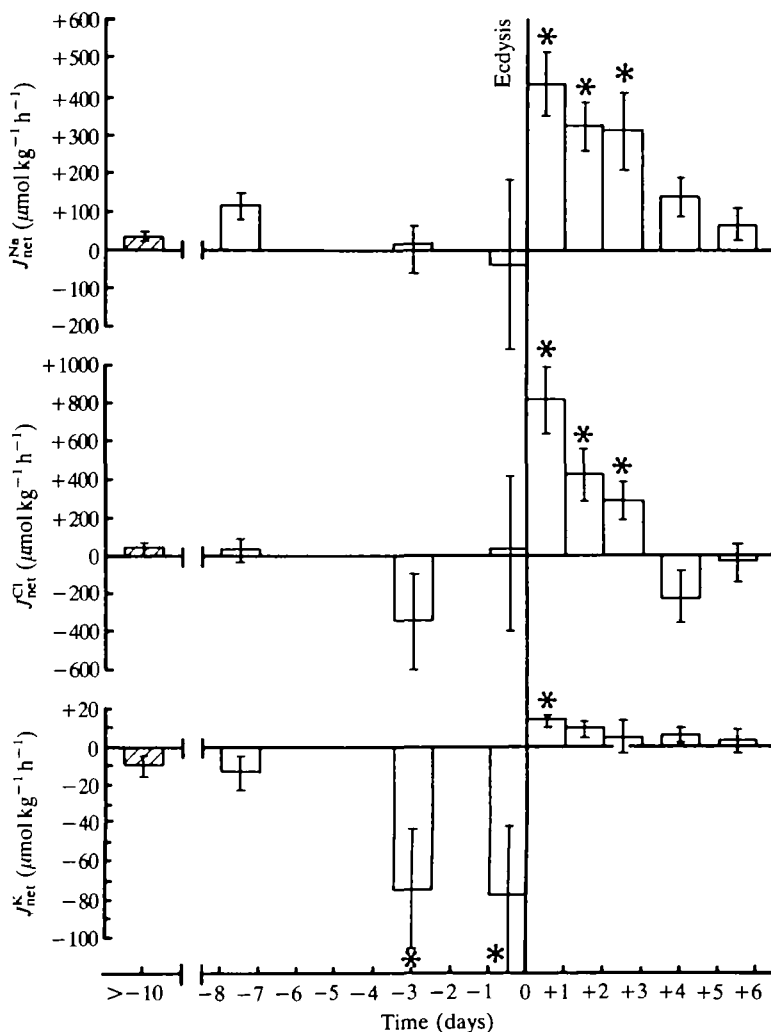

Fig. 2. Whole-animal net fluxes of  $\text{Na}^+$ ,  $\text{Cl}^-$  and  $\text{K}^+$  throughout the moulting cycle of *Procambarus clarkii* (mean mass  $1.66 \pm 0.18$  g;  $N=12$ ). For additional details consult legend to Fig. 1. Previous intermolt data are shown as cross-hatched bars.

revealed significant changes in all three during the moulting cycle.  $\dot{M}_{\text{O}_2}$  was unchanged until 2 days prior to ecdysis, when it increased to around  $80 \mu\text{mol kg}^{-1} \text{min}^{-1}$ , remaining elevated ( $P < 0.008$ ) throughout the shedding process and into the first day postmolt, when it returned to intermolt levels. After 8 days postmolt, the values were significantly ( $P < 0.02$ ) below those of the previous intermolt.

$\dot{M}_{\text{CO}_2}$  similarly exhibited a doubling ( $P < 0.001$ ) of intermolt values in the immediate premolt period. During the entire postmolt period,  $\dot{M}_{\text{CO}_2}$  was significantly ( $P < 0.034$ ) depressed below intermolt values. The combined effect



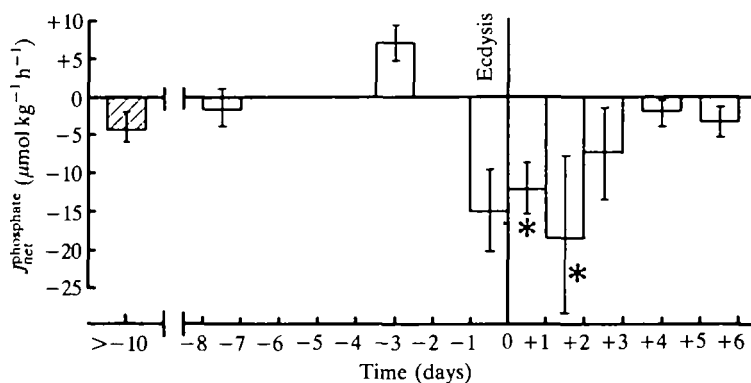

Fig. 3. Whole-animal net flux of phosphate throughout the moulting cycle of *Procambarus clarkii* (mean mass  $1.66 \pm 0.18$  g;  $N=12$ ). For additional details consult legend to Fig. 1. Previous intermolt data are shown as cross-hatched bars.

of these changes was that R was significantly ( $P < 0.011$ ) lowered during the first 4 days of postmolt, although it had recovered by 8 days.

### Discussion

This study has shown that the net fluxes of several major body electrolytes vary as a function of moulting stage in the freshwater crayfish. As crayfish approached premolt they switched from  $\text{Ca}^{2+}$  balance to net efflux (Fig. 1) at identical rates to those reported by Greenaway (1974b) in the crayfish *Austropotamobius pallipes*. In that study Greenaway calculated that 83 % of total body  $\text{Ca}^{2+}$  was lost at ecdysis; of this 56 % was in the exuviae and 27 % in soluble form. Thus  $\text{Ca}^{2+}$  storage in haemolymph and gastroliths (Travis, 1960, 1963) would appear to be relatively unimportant (17 % of total  $\text{Ca}^{2+}$ ) compared with postmolt uptake from external sources.

In previous whole-animal studies (crayfish, Greenaway, 1974c; blue crab, Cameron, 1985, 1989)  $\text{Ca}^{2+}$  influx prior to shedding was never reported. However, Henry and Kormanik (1985) did report premolt  $\text{Ca}^{2+}$  uptake in isolated crab cuticle and Porcella *et al.* (1969) have reported that this occurred in *Daphnia*. Postmolt  $\text{Ca}^{2+}$  uptake rates were of the same order of magnitude as reported for crayfish in Greenaway (1975c). However, calcification was accomplished more rapidly in the present study (5 as opposed to 10 days) since the crayfish were smaller (2 as opposed to 10 g) and were maintained at a higher ambient temperature (21 compared to 10°C). Based on the existing chemical gradient,  $\text{Ca}^{2+}$  influx into the crayfish is necessarily by active uptake (Greenaway, 1985) and is elicited literally within minutes of shedding (Greenaway, 1974c). The uptake mechanism has not been identified but probably involves a  $\text{Ca}^{2+}$ -ATPase, if it is analogous with  $\text{Ca}^{2+}$  uptake across freshwater fish gills (Fenwick, 1978, modelled by Flik *et al.* 1985). By comparison, postmolt influx into the marine crab

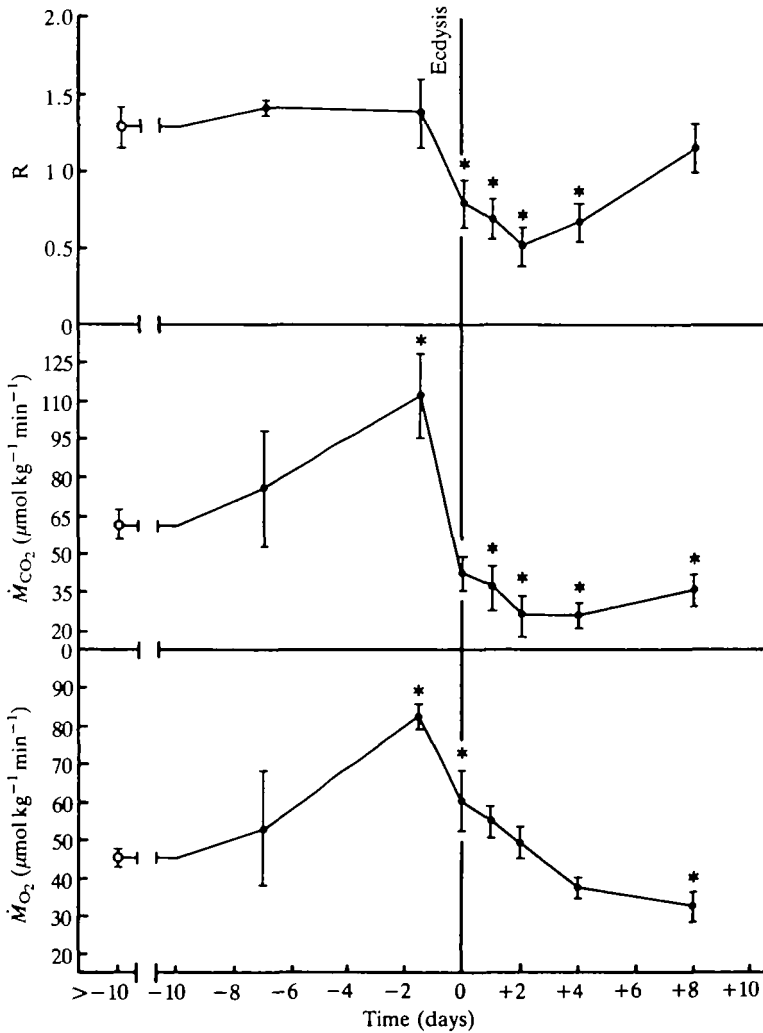

Fig. 4. Oxygen uptake rate ( $\dot{M}_{O_2}$ ), carbon dioxide excretion rate ( $\dot{M}_{CO_2}$ ) and apparent gas exchange ratio (R) with time throughout the moulting cycle in *Procambarus clarkii* (mean mass  $1.71 \pm 0.14$  g) at  $21^\circ\text{C}$ . Ecdysis is indicated by the vertical line. Values are expressed as mean  $\pm$  s.e.m. ( $N=12$ ). Asterisks denote significance compared with previous intermolt (more than 10 days prior to ecdysis, open symbols).

*Callinectes* ( $\approx 200$  g wet mass) was of the order of  $+8000 \mu\text{mol kg}^{-1} \text{h}^{-1}$  (Cameron, 1985) and did not commence until 12–24 h after ecdysis. Cameron (1989) has recently shown that this occurs by passive diffusion not active uptake; so the two processes do not appear to be analogous.

The apparent  $\text{H}^+$  fluxes (Fig. 1) mirrored the net  $\text{Ca}^{2+}$  fluxes, suggesting that the transport mechanisms are linked. A small intermolt efflux of  $\text{H}^+$  (alternatively  $\text{HCO}_3^-$  uptake) became a sizeable  $\text{H}^+$  uptake (or  $\text{HCO}_3^-$  output) immediately prior to ecdysis. Resorption of cuticular  $\text{CaCO}_3$  from the old skeleton

prior to ecdysis should produce  $\text{Ca}^{2+}$  and basic equivalents in the ratio of 1:2 (Cameron, 1985), which is the observed ratio. While it is tempting to conclude that the acid–base flux is a base efflux (probably  $\text{HCO}_3^-$ ), the measurement technique does not differentiate between acid influx and base efflux or identify the ion. In the day immediately preceding ecdysis, the  $\text{Ca}^{2+}$  and acidic equivalent fluxes were not strongly correlated. All crayfish exhibited an influx of acidic equivalents even though  $\text{Ca}^{2+}$  uptake had commenced in certain individuals. During postmoult the observed fluxes were in the expected direction (i.e.  $\text{Ca}^{2+}$  uptake;  $\text{H}^+$  output/ $\text{HCO}_3^-$  uptake) and similarly obeyed the stoichiometry of the calcification equation given in the Introduction. The fluxes also followed a similar time course, accomplishing calcification in approximately 5–6 days. The acid–base flux was attributable mainly to the titratable component; ammonia contributed little to the net flux. The postmoult increase in ammonia efflux may have been due to an increase in cuticular permeability or increased protein metabolism.

Intermoult crayfish exhibited a small net uptake of  $\text{Na}^+$  and  $\text{Cl}^-$  (Fig. 2), as demonstrated in previous studies (Shaw, 1964; Ehrenfeld, 1974; Wheatly, 1989b); during most of premoult they remained in ion balance with respect to both ions. Net fluxes of  $\text{Na}^+$  and  $\text{Cl}^-$  were variable on the day preceding ecdysis, yielding zero mean values. Uptake of  $\text{Na}^+$  and  $\text{Cl}^-$  occurred in those individuals in which  $\text{Ca}^{2+}$  uptake had commenced (see above). Wherever  $\text{Ca}^{2+}$  efflux persisted,  $\text{Na}^+$  and  $\text{Cl}^-$  net effluxes were also measured. This is strong evidence that part of whole-animal  $\text{Ca}^{2+}$  uptake is linked to uptake of  $\text{Na}^+$  and  $\text{Cl}^-$ . This is in accordance with the view that  $\text{Na}^+$  and  $\text{Ca}^{2+}$  fluxes across epithelial cells are related by a  $\text{Na}^+/\text{Ca}^{2+}$  exchanger (see review by Taylor and Windhager, 1979). Along these lines, Roer (1980) demonstrated that  $\text{Ca}^{2+}$  transport across an isolated crab cuticular hypodermis was  $\text{Na}^+$ -dependent.

Following ecdysis, there were large net influxes of both  $\text{Na}^+$  and  $\text{Cl}^-$ , presumably to correct the haemodilution resulting from water uptake. Ion balance was restored within 3 days while calcification was still in progress. Although these fluxes were numerically only half the net  $\text{Ca}^{2+}$  influx rate, they are far larger than any recorded in response to acid–base disequilibria in the literature (Wood and Rogano, 1986; Wheatly, 1989b). Furthermore, assuming that unidirectional  $\text{Na}^+$  efflux remained at intermoult values ( $-300 \mu\text{mol kg}^{-1} \text{h}^{-1}$  in the crayfish *Pacifastacus*; Wheatly, 1989b), unidirectional influx can be estimated as  $+1000 \mu\text{mol kg}^{-1} \text{h}^{-1}$ , which is a substantial rate. Postmoult net  $\text{Cl}^-$  fluxes were higher than  $\text{Na}^+$  fluxes, possibly reflecting greater diffusional permeability. The evidence from unidirectional flux studies on other crayfish species (*Orconectes*, Wood and Rogano, 1986; *Pacifastacus*, Wheatly, 1989b), indicates that the integument is more permeable to  $\text{Cl}^-$  than to  $\text{Na}^+$ . Again, assuming a control unidirectional  $\text{Cl}^-$  efflux of  $-500 \mu\text{mol kg}^{-1} \text{h}^{-1}$ , postmoult  $\text{Cl}^-$  influx rate can be estimated as  $+1300 \mu\text{mol kg}^{-1} \text{h}^{-1}$ . In the likely event that diffusional efflux increases at ecdysis, unidirectional influxes of both ions would be even greater than predicted.

The switch from  $\text{K}^+$  balance to a sizeable net efflux (Fig. 2) in the 3 days prior to

ecdysis deserves explanation. The extracellular fluid compartment in the carapace selectively concentrates electrolytes, including  $K^+$  (M. G. Wheatly, unpublished observations). Little is known of the carapace fluid dynamics during the moult but it is likely that fluid is reabsorbed as the old skeleton is degraded. In addition, atrophy of various somatic muscle cells (Skinner, 1985) could contribute to high circulating  $K^+$  levels which would result in increased diffusional loss. The initial postmoult uptake is insufficient to make up for the premoult loss, from which one must conclude that  $K^+$  is obtained over the long term in the diet.

The significant postmoult phosphate excretion (Fig. 3) may have been attributable to enhanced diffusional permeability before the new exoskeleton had hardened. Alternatively it may have resulted from increased urinary flow. While this has never been measured in freshly moulted decapods, the increase in hydrostatic pressure at ecdysis should increase filtration pressure (Mykles, 1980; deFur *et al.* 1985) and thereby urine flow. Because of large variability between animals, similar trends could not be demonstrated for  $Mg^{2+}$  and sulphate, which are also prominent components of both haemolymph and urine (Wheatly and Toop, 1989).

Intermoult  $\dot{M}_{O_2}$  and  $\dot{M}_{CO_2}$  were not significantly different (Fig. 4). The fact that  $R$  exceeded unity (1.27) may have arisen from aeration of the flux water which would have reduced ambient  $P_{CO_2}$ , thus facilitating  $CO_2$  excretion. The only  $R$  value in the literature for which  $\dot{M}_{CO_2}$  had been measured and not estimated was 0.6, which was calculated for the land crab *Cardisoma* by Wood and Randall (1981). They attributed the low value to retention of respiratory  $CO_2$  for carapace formation. However, during exercise  $R$  did rise above 1 in *Cardisoma*, confirming that this can occur in decapods. Owing to the small size range of the crayfish used in this study, absolute values for  $\dot{M}_{O_2}$  and  $\dot{M}_{CO_2}$  cannot be compared with the majority of existing data. The  $\dot{M}_{O_2}$  values were of the same order of magnitude as values measured in similarly sized *Pacifastacus leniusculus* (Wheatly, 1989a).

The rate of  $O_2$  consumption has been measured during the moulting cycle in the crayfish (Scudamore, 1947) as well as certain marine decapods (Lewis and Haefner, 1976; Penkoff and Thurberg, 1982; Mangum *et al.* 1985). Common to all the studies was a doubling of  $\dot{M}_{O_2}$  around the time of ecdysis, although the precise timing of the peak rate varied. The present finding that  $\dot{M}_{O_2}$  is highest immediately premoult (Fig. 4) agrees with certain studies (Scudamore, 1947; Penkoff and Thurberg, 1982). Some (Scudamore, 1947; Lewis and Haefner, 1976) have suggested that the rate drops during the actual shedding process, based on measurements made using closed respirometers. Some authors have reported elevated postmoult rates for up to 2 days (Scudamore, 1947; Penkoff and Thurberg, 1982; Mangum *et al.* 1985). In the present study the mass-specific  $\dot{M}_{O_2}$  returned to control levels within a day. By 8 days postmoult,  $\dot{M}_{O_2}$  had dropped significantly below the previous intermoult value as reported by Penkoff and Thurberg (1982); when converted to whole-animal rates there was no difference in successive intermoult rates, suggesting that this was an artefact of the increase in mass due to water loading.

$\dot{M}_{\text{CO}_2}$  dropped significantly below  $\dot{M}_{\text{O}_2}$  for the first 4 days postmoult, possibly representing the net result of  $\text{HCO}_3^-$  uptake countering  $\text{CO}_2$  elimination. Assuming that R remained at 1 for cellular respiration, then an  $\dot{M}_{\text{CO}_2}$  deficit of  $1178 \mu\text{mol kg}^{-1} \text{h}^{-1}$  ( $2356 \mu\text{equiv kg}^{-1} \text{h}^{-1}$ ) can be calculated. This is of the same order of magnitude as the uptake of basic equivalents illustrated in Fig. 1, given that measurements were on separate experimental series. The 'apparent' respiratory exchange ratio meanwhile dropped (Fig. 4) while calcification was underway. In the 24 h preceding ecdysis, the  $\dot{M}_{\text{CO}_2}$  excess was  $1800 \mu\text{mol kg}^{-1} \text{h}^{-1}$ , which is similar to the measured output of basic equivalents (Fig. 1). Cameron and Wood (1985) measured a net  $\text{CO}_2$  uptake from sea water in postmoult blue crabs, concluding that the  $\text{CO}_2$  source for calcification was at least partly external. Subsequent measurements of  $P_{\text{CO}_2}$  failed to reveal that the carapace was a sink for metabolic  $\text{CO}_2$  (Cameron, 1985). This suggests that the external water provided the majority of the  $\text{CO}_2$  in the form of  $\text{HCO}_3^-$ . Uptake of  $\text{HCO}_3^-$ , like  $\text{Ca}^{2+}$  uptake, proceeds at a relatively reduced rate in crayfish compared with the blue crab; this may reflect the lowered external  $\text{HCO}_3^-$  concentration or some direct or indirect limitation to the uptake mechanism. Postmoult ion uptake mechanisms are examined in greater detail in a separate paper (M. G. Wheatly and A. T. Gannon, in preparation).

This study was supported by NSF grant no. DCB-8415373 to MGW. We thank Dr Robert Romaine from Louisiana State University Agricultural Centre for supplying crayfish, Leanne Yow for technical assistance, Grace Kiltie for preparing the manuscript and Daryl Harrison for drawing the figures.

### References

- ATKINSON, A., GATEMBY, A. O. AND LOWE, A. G. (1973). The determination of inorganic orthophosphate in biological systems. *Biochem. biophys. Acta* **320**, 195–204.
- BAILEY, N. T. J. (1981). *Statistical Methods in Biology*, 2nd edn. London, England: Hodder & Stoughton.
- CAMERON, J. N. (1985). Post-moult calcification in the blue crab (*Callinectes sapidus*): Relationships between apparent net  $\text{H}^+$  excretion, calcium and bicarbonate. *J. exp. Biol.* **119**, 275–285.
- CAMERON, J. N. (1989). Post-moult calcification in the blue crab *Callinectes sapidus*: timing and mechanism. *J. exp. Biol.* **143**, 285–304.
- CAMERON, J. N. AND WOOD, C. M. (1985). Apparent  $\text{H}^+$  excretion and  $\text{CO}_2$  dynamics accompanying carapace mineralization in the blue crab (*Callinectes sapidus*) following moulting. *J. exp. Biol.* **114**, 181–196.
- DEFUR, P. L., MANGUM, C. P. AND McMAHON, B. R. (1985). Cardiovascular and ventilatory changes during ecdysis in the blue crab *Callinectes sapidus* Rathbun. *J. crust. Biol.* **5**, 207–215.
- DEJOURS, P. (1981). *Principles of Comparative Respiratory Physiology*, 2nd edn. New York: Elsevier North-Holland, Inc.
- DRACH, P. (1939). Mue et cycle d'intermue chez les Crustacés décapodes. *Ann. Inst. Océanogr.* (Paris) **19**, 103–391.
- EHRENFELD, J. (1974). Aspects of ionic transport mechanisms in crayfish *Astacus leptodactylus*. *J. exp. Biol.* **61**, 57–70.
- FENWICK, J. C. (1978).  $\text{Ca}^{2+}$  activated adenosine triphosphatase activity in the gills of freshwater and seawater-adapted eels (*Anguilla rostrata*). *Comp. Biochem. Physiol.* **62B**, 67–70.

- FLIK, G., VANRIJS, J. H. AND WENDELAAR BONGA, S. E. (1985). Evidence for high-affinity  $\text{Ca}^{2+}$ -ATPase activity and ATP-driven  $\text{Ca}^{2+}$ -transport in membrane preparations of the gill epithelium of the cichlid fish *Oreochromis mossambicus*. *J. exp. Biol.* **119**, 335–347.
- GREENAWAY, P. (1974a). Total body calcium and haemolymph calcium concentrations in the crayfish *Austropotamobius pallipes* (Lereboullet). *J. exp. Biol.* **61**, 19–26.
- GREENAWAY, P. (1974b). Calcium balance at the premoult stage of the freshwater crayfish *Austropotamobius pallipes* (Lereboullet). *J. exp. Biol.* **61**, 27–34.
- GREENAWAY, P. (1974c). Calcium balance at the postmoult stage of the freshwater crayfish *Austropotamobius pallipes* (Lereboullet). *J. exp. Biol.* **61**, 35–45.
- GREENAWAY, P. (1985). Calcium balance and moulting in the Crustacea. *Biol. Rev.* **60**, 425–454.
- HENRY, R. P. AND KORMANIK, G. A. (1985). Carbonic anhydrase activity and calcium deposition during the molt cycle of the blue crab, *Callinectes sapidus*. *J. crust. Biol.* **5**, 234–241.
- JACKSON, S. G. AND MCCANDLESS, E. L. (1978). Simple, rapid, turbidometric determination of inorganic sulfate and/or protein. *Analyt. Biochem.* **90**, 802–808.
- LEWIS, E. G. AND HAEFNER, P. A., JR (1976). Oxygen consumption of the blue crab *Callinectes sapidus* Rathbun, from proecdysis to postecdysis. *Comp. Biochem. Physiol.* **54A**, 55–60.
- MCDONALD, D. G. AND WOOD, C. M. (1981). Branchial and renal acid and ion fluxes in the rainbow trout, *Salmo gairdneri*, at low environmental pH. *J. exp. Biol.* **93**, 101–118.
- MCWHINNIE, M. A. (1962). Gastrolith growth and calcium shifts in the freshwater crayfish *Orconectes virilis*. *Comp. Biochem. Physiol.* **7**, 1–14.
- MANGUM, C. P., MCMAHON, B. R., DEFUR, P. L. AND WHEATLY, M. G. (1985). Gas exchange, acid–base balance and the oxygen supply to the tissues during a molt of the blue crab *Callinectes sapidus*. *J. crust. Biol.* **5**, 188–206.
- MYKLES, D. L. (1980). The mechanism of fluid absorption at ecdysis in the American lobster *Homarus americanus*. *J. exp. Biol.* **84**, 89–101.
- OTT, L. (1988). *An Introduction to Statistical Methods and Data Analysis*, 3rd edn. Boston: PWS-Kent Pub. Co.
- PENKOFF, S. J. AND THURBERG, F. P. (1982). Changes in oxygen consumption of the American lobster, *Homarus americanus* during the molt cycle. *Comp. Biochem. Physiol.* **72A**, 621–622.
- PORCELLA, D. B., RIXFORD, C. E. AND SLATER, J. V. (1969). Molting and calcification in *Daphnia magna*. *Physiol. Zool.* **42**, 148–159.
- ROER, R. D. (1980). Mechanisms of resorption and deposition of calcium in the carapace of the crab *Carcinus maenas*. *J. exp. Biol.* **88**, 205–218.
- ROER, R. AND DILLAMAN, R. (1984). The structure and calcification of the crustacean cuticle. *Am. Zool.* **24**, 893–909.
- SCUDAMORE, H. H. (1947). The influence of the sinus gland upon molting and associated changes in the crayfish. *Physiol. Zool.* **20**, 187–208.
- SHAW, J. (1964). The control of the salt balance in the Crustacea. *Symp. Soc. exp. Biol.* **18**, 237–254.
- SKINNER, D. M. (1985). Molting and regeneration. In *The Biology of Crustacea*, vol. 9 (ed. D. E. Bliss and L. H. Mantel), pp. 43–146. New York: Academic Press.
- SOLORZANO, L. (1969). Determination of ammonia in natural waters by the phenylhypochlorite method. *Limnol. Oceanogr.* **14**, 799–801.
- STEVENSON, J. R. (1985). Dynamics of the integument. In *The Biology of Crustacea*, vol. 9 (ed. D. E. Bliss and L. H. Mantel), pp. 1–42. New York: Academic Press.
- TAYLOR, A. AND WINDHAGER, E. E. (1979). Possible role of cytosolic calcium and Na–Ca exchange in regulation of transepithelial sodium transport. *Am. J. Physiol.* **236**, F505–F512.
- TRAVIS, D. F. (1960). Matrix and mineral deposition in the skeletal structures of the decapod Crustacea (Phylum Arthropoda). In *Calcification in Biological Systems*, AAAS Pub. 64 (ed. R. F. Sognaes), pp. 57–116. Washington, DC: American Association for the Advancement of Science.
- TRAVIS, D. F. (1963). Structural features of mineralization from tissues to macromolecular levels of organization in the decapod Crustacea. *Ann. N.Y. Acad. Sci.* **109**, 177–245.
- WHEATLY, M. G. (1989a). Standard rate of  $\text{O}_2$  uptake and body size in the crayfish *Pacifastacus leniusculus* Dana 1852 (Decapoda, Astacidae): Intra- versus interspecific relations in crustaceans. *J. crust. Biol.* **9**, 212–216.
- WHEATLY, M. G. (1989b). Physiological responses of the crayfish *Pacifastacus leniusculus*

- (Dana) to environmental hyperoxia. I. Extracellular acid–base and electrolyte status and transbranchial exchange. *J. exp. Biol.* **143**, 33–51.
- WHEATLY, M. G. AND TOOP, T. (1989). Physiological responses of the crayfish *Pacifastacus leniusculus* (Dana) to environmental hyperoxia. II. The role of the antennal gland. *J. exp. Biol.* **143**, 53–70.
- WOOD, C. M. AND RANDALL, D. J. (1981). Oxygen and carbon dioxide exchange during exercise in the land crab (*Cardisoma carnifex*). *J. exp. Zool.* **218**, 7–22.
- WOOD, C. M. AND ROGANO, M. S. (1986). Physiological responses to acid stress in crayfish (*Orconectes*): haemolymph ions, acid–base status, and exchanges with the environment. *Can. J. Fish aquat. Sci.* **43**, 1017–1026.
